# Supplementary material for: Concordance among Gene-Expression–Based Predictors for Breast Cancer
Source: Atypon-hosted journal article supplement (doi:10.1056/nejmoa052933), 2006-08-09
Supplement: nejm_fan_560sa1.pdf [file nejm_fan_560sa1.pdf]

## Supplementary Appendix

This appendix has been provided by the authors to give readers additional information about their work.

Supplement to: Fan C, Oh DS, Wessels L, et al. Concordance among gene-expression-based predictors for breast cancer. *N Engl J Med* 2006;355:560-9.

**Supplemental Statistical Methods.** For the 70-gene and Wound-Response predictions, we used the individual sample assignments provided by Chang *et al.*<sup>1</sup>. Briefly, the assignments made by the 70-gene and Wound-Response predictors were as follows: for the 70-gene predictor, a sample was classified according to the correlation of its expression levels of the 70 genes to a previously determined average centroid/profile of these genes in tumors from patients with the “Good” prognosis profile. Patients with a correlation coefficient of  $>0.4$  were classified as Good, and  $\leq 0.4$  as Poor<sup>2, 3</sup>. For the Wound-Response predictor, a sample was classified according to the Pearson correlation of its expression levels of the “core serum response (CSR)” genes to the serum-activated fibroblast centroid. Patients with  $>-0.15$  correlation were classified as Wound-Response Activated, and  $\leq -0.15$  as Wound-Response Quiescent<sup>1</sup>.

We used a nearest centroid predictor to classify tumors according to Intrinsic Subtype<sup>8</sup>. Briefly, a new “intrinsic” gene set was developed as described in Sorlie *et al.* 2003<sup>4</sup>, using 24 new paired tumor samples assayed on Agilent Oligo microarrays, and 105 tumors in total. Next, this gene list was used in a hierarchical clustering analysis on a 311 tumor sample test set created by combining together the two-color DNA microarray data sets of Sorlie *et al.* 2001 and 2003<sup>4, 5</sup>, van’t Veer *et al.*<sup>3</sup> and Sotiriou *et al.*<sup>6</sup>. This cluster was then used as the starting point to create five Subtype Mean expression profiles/Centroids (Luminal A, Luminal B, HER2+/ER-, Basal-like and Normal-like) by averaging the gene expression profiles for the samples within each dendrogram branch/subtype<sup>8</sup>. Finally, new samples like those in the Chang *et al.* dataset, are then individually compared to each centroid using the 306 intrinsic genes, and are assigned to

the nearest centroid as determined by Spearman correlation. For more details on this nearest centroid predictor (also referred to as a Single Sample Predictor), the data and how to implement it, see <https://genome.unc.edu/pubsup/breastTumor/>.

To classify tumors using the Recurrence Score predictor, we used the microarray data for all 21 RS-genes and applied the algorithm and scaling methods described in Paik *et al.* (2004). Briefly, the expression of the 16 target genes was normalized relative to the 5 reference genes; next, the target genes were scaled as described for the qRT-PCR data, weighted averaging was performed and we then used these values and the RS algorithm to generate a Recurrence Score for each patient, which ranged from 0 to 100; scaling was done separately for the 295 patient group and for the 225 ER+ patient group. Using the cutoffs described in Paik *et al.* (0-18, 19-30, 31-100), we assigned each patient into the Low, Intermediate or High risk groups. Finally, we used the log-base-2 ratio of HOXB13:IL17BR as a means of patient stratification, using a cutoff of -0.15 as described in Ma *et al.*<sup>7</sup> to classify patients as having either a High or Low 2-gene ratio.

It should be noted that for the 70-gene, Wound-Response and Intrinsic Subtype profiles, a subset of the samples in this 295-sample dataset were used to train these predictors (75 of the 295 samples were previously published<sup>3</sup> and used to train the 70-gene profile, these same 75 samples were also part of the 311 tumor dataset used to derive the Intrinsic Subtype Centroid profiles<sup>8</sup>, and 148 of the 295 samples were randomly selected to train the Wound-Response profile<sup>1</sup>). Therefore, their performance in the Kaplan-Meier and multivariate analyses described below is positively biased. However, as this paper is

focused on comparing the actual predictions themselves and is not focused on identifying the “best” predictor, we believed it best to include as many samples as possible in the analysis as opposed to removing subsets of samples due to training and test set issues (if we removed training set samples, the resulting test dataset would be greatly reduced — to fewer than 147 samples and possibly as few as 72 samples). We acknowledge that the RS and 2-gene predictors are thus at a prognostic disadvantage relative to the other three because the 295 samples represent a true test set for these two predictors; this point should be taken into consideration when interpreting the results of the survival analyses and hazard ratios from multivariate analyses.

#### **References for Supplemental Methods**

1. Chang HY, Nuyten DS, Sneddon JB, et al. Robustness, scalability, and integration of a wound-response gene expression signature in predicting breast cancer survival. *Proc Natl Acad Sci U S A* 2005;102(10):3738-43.
2. van de Vijver MJ, He YD, van't Veer LJ, et al. A gene-expression signature as a predictor of survival in breast cancer. *N Engl J Med* 2002;347(25):1999-2009.
3. van 't Veer LJ, Dai H, van de Vijver MJ, et al. Gene expression profiling predicts clinical outcome of breast cancer. *Nature* 2002;415(6871):530-6.
4. Sorlie T, Tibshirani R, Parker J, et al. Repeated observation of breast tumor subtypes in independent gene expression data sets. *Proc Natl Acad Sci U S A* 2003;100(14):8418-23.
5. Sorlie T, Perou CM, Tibshirani R, et al. Gene expression patterns of breast carcinomas distinguish tumor subclasses with clinical implications. *Proc Natl Acad Sci U S A* 2001;98(19):10869-74.
6. Sotiriou C, Neo SY, McShane LM, et al. Breast cancer classification and prognosis based on gene expression profiles from a population-based study. *Proc Natl Acad Sci U S A* 2003;100(18):10393-8.
7. Ma XJ, Wang Z, Ryan PD, et al. A two-gene expression ratio predicts clinical outcome in breast cancer patients treated with tamoxifen. *Cancer Cell* 2004;5(6):607-16.
8. Hu Z, Fan C, Oh DS, et al. The molecular portraits of breast tumors are conserved across microarray platforms. *BMC Genomics* 2006;7(1):96.

**Supplemental Table 1.** Individual sample classifications made by the five different gene expression-based profiles (Next Page).

SAMPLE LIST

| Sample ID | Age | ER (1=positive, 0=negative) | tumor size (1= <2cm, 2=2-5) | Grade (1=well-differentiated, 2=moderately, 3=poorly) | node status (1=0 nodes, 2=1-3 nodes, 3=4+ nodes) | # of nodes positive for tumor | TREATMENT simplified (loc=local, tam=tamoxifen, chemo=chemotherapy, and=and, tam=tamoxifen) | RF5 months | RF8 months | OS event (0=alive, 1=OOD c) | O 8 months | Intrinsic Subtype (as assign) | 70+ Gene Profile (from Chang) | Recurrence Profile (1=0, 2=1-3, 3=4-6, 4=7-9, 5=10-15, 6=16-20, 7=21-25, 8=26-30, 9=31-35, 10=36-40, 11=41-45, 12=46-50, 13=51-55, 14=56-60, 15=61-65, 16=66-70, 17=71-75, 18=76-80, 19=81-85, 20=86-90, 21=91-95, 22=96-100, 23=101-105, 24=106-110, 25=111-115, 26=116-120, 27=121-125, 28=126-130, 29=131-135, 30=136-140, 31=141-145, 32=146-150, 33=151-155, 34=156-160, 35=161-165, 36=166-170, 37=171-175, 38=176-180, 39=181-185, 40=186-190, 41=191-195, 42=196-200, 43=201-205, 44=206-210, 45=211-215, 46=216-220, 47=221-225, 48=226-230, 49=231-235, 50=236-240, 51=241-245, 52=246-250, 53=251-255, 54=256-260, 55=261-265, 56=266-270, 57=271-275, 58=276-280, 59=281-285, 60=286-290, 61=291-295, 62=296-300, 63=301-305, 64=306-310, 65=311-315, 66=316-320, 67=321-325, 68=326-330, 69=331-335, 70=336-340, 71=341-345, 72=346-350, 73=351-355, 74=356-360, 75=361-365, 76=366-370, 77=371-375, 78=376-380, 79=381-385, 80=386-390, 81=391-395, 82=396-400, 83=401-405, 84=406-410, 85=411-415, 86=416-420, 87=421-425, 88=426-430, 89=431-435, 90=436-440, 91=441-445, 92=446-450, 93=451-455, 94=456-460, 95=461-465, 96=466-470, 97=471-475, 98=476-480, 99=481-485, 100=486-490, 101=491-495, 102=496-500, 103=501-505, 104=506-510, 105=511-515, 106=516-520, 107=521-525, 108=526-530, 109=531-535, 110=536-540, 111=541-545, 112=546-550, 113=551-555, 114=556-560, 115=561-565, 116=566-570, 117=571-575, 118=576-580, 119=581-585, 120=586-590, 121=591-595, 122=596-600, 123=601-605, 124=606-610, 125=611-615, 126=616-620, 127=621-625, 128=626-630, 129=631-635, 130=636-640, 131=641-645, 132=646-650, 133=651-655, 134=656-660, 135=661-665, 136=666-670, 137=671-675, 138=676-680, 139=681-685, 140=686-690, 141=691-695, 142=696-700, 143=701-705, 144=706-710, 145=711-715, 146=716-720, 147=721-725, 148=726-730, 149=731-735, 150=736-740, 151=741-745, 152=746-750, 153=751-755, 154=756-760, 155=761-765, 156=766-770, 157=771-775, 158=776-780, 159=781-785, 160=786-790, 161=791-795, 162=796-800, 163=801-805, 164=806-810, 165=811-815, 166=816-820, 167=821-825, 168=826-830, 169=831-835, 170=836-840, 171=841-845, 172=846-850, 173=851-855, 174=856-860, 175=861-865, 176=866-870, 177=871-875, 178=876-880, 179=881-885, 180=886-890, 181=891-895, 182=896-900, 183=901-905, 184=906-910, 185=911-915, 186=916-920, 187=921-925, 188=926-930, 189=931-935, 190=936-940, 191=941-945, 192=946-950, 193=951-955, 194=956-960, 195=961-965, 196=966-970, 197=971-975, 198=976-980, 199=981-985, 200=986-990, 201=991-995, 202=996-1000, 203=1001-1005, 204=1006-1010, 205=1011-1015, 206=1016-1020, 207=1021-1025, 208=1026-1030, 209=1031-1035, 210=1036-1040, 211=1041-1045, 212=1046-1050, 213=1051-1055, 214=1056-1060, 215=1061-1065, 216=1066-1070, 217=1071-1075, 218=1076-1080, 219=1081-1085, 220=1086-1090, 221=1091-1095, 222=1096-1100, 223=1101-1105, 224=1106-1110, 225=1111-1115, 226=1116-1120, 227=1121-1125, 228=1126-1130, 229=1131-1135, 230=1136-1140, 231=1141-1145, 232=1146-1150, 233=1151-1155, 234=1156-1160, 235=1161-1165, 236=1166-1170, 237=1171-1175, 238=1176-1180, 239=1181-1185, 240=1186-1190, 241=1191-1195, 242=1196-1200, 243=1201-1205, 244=1206-1210, 245=1211-1215, 246=1216-1220, 247=1221-1225, 248=1226-1230, 249=1231-1235, 250=1236-1240, 251=1241-1245, 252=1246-1250, 253=1251-1255, 254=1256-1260, 255=1261-1265, 256=1266-1270, 257=1271-1275, 258=1276-1280, 259=1281-1285, 260=1286-1290, 261=1291-1295, 262=1296-1300, 263=1301-1305, 264=1306-1310, 265=1311-1315, 266=1316-1320, 267=1321-1325, 268=1326-1330, 269=1331-1335, 270=1336-1340, 271=1341-1345, 272=1346-1350, 273=1351-1355, 274=1356-1360, 275=1361-1365, 276=1366-1370, 277=1371-1375, 278=1376-1380, 279=1381-1385, 280=1386-1390, 281=1391-1395, 282=1396-1400, 283=1401-1405, 284=1406-1410, 285=1411-1415, 286=1416-1420, 287=1421-1425, 288=1426-1430, 289=1431-1435, 290=1436-1440, 291=1441-1445, 292=1446-1450, 293=1451-1455, 294=1456-1460, 295=1461-1465, 296=1466-1470, 297=1471-1475, 298=1476-1480, 299=1481-1485, 300=1486-1490, 301=1491-1495, 302=1496-1500, 303=1501-1505, 304=1506-1510, 305=1511-1515, 306=1516-1520, 307=1521-1525, 308=1526-1530, 309=1531-1535, 310=1536-1540, 311=1541-1545, 312=1546-1550, 313=1551-1555, 314=1556-1560, 315=1561-1565, 316=1566-1570, 317=1571-1575, 318=1576-1580, 319=1581-1585, 320=1586-1590, 321=1591-1595, 322=1596-1600, 323=1601-1605, 324=1606-1610, 325=1611-1615, 326=1616-1620, 327=1621-1625, 328=1626-1630, 329=1631-1635, 330=1636-1640, 331=1641-1645, 332=1646-1650, 333=1651-1655, 334=1656-1660, 335=1661-1665, 336=1666-1670, 337=1671-1675, 338=1676-1680, 339=1681-1685, 340=1686-1690, 341=1691-1695, 342=1696-1700, 343=1701-1705, 344=1706-1710, 345=1711-1715, 346=1716-1720, 347=1721-1725, 348=1726-1730, 349=1731-1735, 350=1736-1740, 351=1741-1745, 352=1746-1750, 353=1751-1755, 354=1756-1760, 355=1761-1765, 356=1766-1770, 357=1771-1775, 358=1776-1780, 359=1781-1785, 360=1786-1790, 361=1791-1795, 362=1796-1800, 363=1801-1805, 364=1806-1810, 365=1811-1815, 366=1816-1820, 367=1821-1825, 368=1826-1830, 369=1831-1835, 370=1836-1840, 371=1841-1845, 372=1846-1850, 373=1851-1855, 374=1856-1860, 375=1861-1865, 376=1866-1870, 377=1871-1875, 378=1876-1880, 379=1881-1885, 380=1886-1890, 381=1891-1895, 382=1896-1900, 383=1901-1905, 384=1906-1910, 385=1911-1915, 386=1916-1920, 387=1921-1925, 388=1926-1930, 389=1931-1935, 390=1936-1940, 391=1941-1945, 392=1946-1950, 393=1951-1955, 394=1956-1960, 395=1961-1965, 396=1966-1970, 397=1971-1975, 398=1976-1980, 399=1981-1985, 400=1986-1990, 401=1991-1995, 402=1996-2000, 403=2001-2005, 404=2006-2010, 405=2011-2015, 406=2016-2020, 407=2021-2025, 408=2026-2030, 409=2031-2035, 410=2036-2040, 411=2041-2045, 412=2046-2050, 413=2051-2055, 414=2056-2060, 415=2061-2065, 416=2066-2070, 417=2071-2075, 418=2076-2080, 419=2081-2085, 420=2086-2090, 421=2091-2095, 422=2096-2100, 423=2101-2105, 424=2106-2110, 425=2111-2115, 426=2116-2120, 427=2121-2125, 428=2126-2130, 429=2131-2135, 430=2136-2140, 431=2141-2145, 432=2146-2150, 433=2151-2155, 434=2156-2160, 435=2161-2165, 436=2166-2170, 437=2171-2175, 438=2176-2180, 439=2181-2185, 440=2186-2190, 441=2191-2195, 442=2196-2200, 443=2201-2205, 444=2206-2210, 445=2211-2215, 446=2216-2220, 447=2221-2225, 448=2226-2230, 449=2231-2235, 450=2236-2240, 451=2241-2245, 452=2246-2250, 453=2251-2255, 454=2256-2260, 455=2261-2265, 456=2266-2270, 457=2271-2275, 458=2276-2280, 459=2281-2285, 460=2286-2290, 461=2291-2295, 462=2296-2300, 463=2301-2305, 464=2306-2310, 465=2311-2315, 466=2316-2320, 467=2321-2325, 468=2326-2330, 469=2331-2335, 470=2336-2340, 471=2341-2345, 472=2346-2350, 473=2351-2355, 474=2356-2360, 475=2361-2365, 476=2366-2370, 477=2371-2375, 478=2376-2380, 479=2381-2385, 480=2386-2390, 481=2391-2395, 482=2396-2400, 483=2401-2405, 484=2406-2410, 485=2411-2415, 486=2416-2420, 487=2421-2425, 488=2426-2430, 489=2431-2435, 490=2436-2440, 491=2441-2445, 492=2446-2450, 493=2451-2455, 494=2456-2460, 495=2461-2465, 496=2466-2470, 497=2471-2475, 498=2476-2480, 499=2481-2485, 500=2486-2490, 501=2491-2495, 502=2496-2500, 503=2501-2505, 504=2506-2510, 505=2511-2515, 506=2516-2520, 507=2521-2525, 508=2526-2530, 509=2531-2535, 510=2536-2540, 511=2541-2545, 512=2546-2550, 513=2551-2555, 514=2556-2560, 515=2561-2565, 516=2566-2570, 517=2571-2575, 518=2576-2580, 519=2581-2585, 520=2586-2590, 521=2591-2595, 522=2596-2600, 523=2601-2605, 524=2606-2610, 525=2611-2615, 526=2616-2620, 527=2621-2625, 528=2626-2630, 529=2631-2635, 530=2636-2640, 531=2641-2645, 532=2646-2650, 533=2651-2655, 534=2656-2660, 535=2661-2665, 536=2666-2670, 537=2671-2675, 538=2676-2680, 539=2681-2685, 540=2686-2690, 541=2691-2695, 542=2696-2700, 543=2701-2705, 544=2706-2710, 545=2711-2715, 546=2716-2720, 547=2721-2725, 548=2726-2730, 549=2731-2735, 550=2736-2740, 551=2741-2745, 552=2746-2750, 553=2751-2755, 554=2756-2760, 555=2761-2765, 556=2766-2770, 557=2771-2775, 558=2776-2780, 559=2781-2785, 560=2786-2790, 561=2791-2795, 562=2796-2800, 563=2801-2805, 564=2806-2810, 565=2811-2815, 566=2816-2820, 567=2821-2825, 568=2826-2830, 569=2831-2835, 570=2836-2840, 571=2841-2845, 572=2846-2850, 573=2851-2855, 574=2856-2860, 575=2861-2865, 576=2866-2870, 577=2871-2875, 578=2876-2880, 579=2881-2885, 580=2886-2890, 581=2891-2895, 582=2896-2900, 583=2901-2905, 584=2906-2910, 585=2911-2915, 586=2916-2920, 587=2921-2925, 588=2926-2930, 589=2931-2935, 590=2936-2940, 591=2941-2945, 592=2946-2950, 593=2951-2955, 594=2956-2960, 595=2961-2965, 596=2966-2970, 597=2971-2975, 598=2976-2980, 599=2981-2985, 600=2986-2990, 601=2991-2995, 602=2996-3000, 603=3001-3005, 604=3006-3010, 605=3011-3015, 606=3016-3020, 607=3021-3025, 608=3026-3030, 609=3031-3035, 610=3036-3040, 611=3041-3045, 612=3046-3050, 613=3051-3055, 614=3056-3060, 615=3061-3065, 616=3066-3070, 617=3071-3075, 618=3076-3080, 619=3081-3085, 620=3086-3090, 621=3091-3095, 622=3096-3100, 623=3101-3105, 624=3106-3110, 625=3111-3115, 626=3116-3120, 627=3121-3125, 628=3126-3130, 629=3131-3135, 630=3136-3140, 631=3141-3145, 632=3146-3150, 633=3151-3155, 634=3156-3160, 635=3161-3165, 636=3166-3170, 637=3171-3175, 638=3176-3180, 639=3181-3185, 640=3186-3190, 641=3191-3195, 642=3196-3200, 643=3201-3205, 644=3206-3210, 645=3211-3215, 646=3216-3220, 647=3221-3225, 648=3226-3230, 649=3231-3235, 650=3236-3240, 651=3241-3245, 652=3246-3250, 653=3251-3255, 654=3256-3260, 655=3261-3265, 656=3266-3270, 657=3271-3275, 658=3276-3280, 659=3281-3285, 660=3286-3290, 661=3291-3295, 662=3296-3300, 663=3301-3305, 664=3306-3310, 665=3311-3315, 666=3316-3320, 667=3321-3325, 668=3326-3330, 669=3331-3335, 670=3336-3340, 671=3341-3345, 672=3346-3350, 673=3351-3355, 674=3356-3360, 675=3361-3365, 676=3366-3370, 677=3371-3375, 678=3376-3380, 679=3381-3385, 680=3386-3390, 681=3391-3395, 682=3396-3400, 683=3401-3405, 684=3406-3410, 685=3411-3415, 686=3416-3420, 687=3421-3425, 688=3426-3430, 689=3431-3435, 690=3436-3440, 691=3441-3445, 692=3446-3450, 693=3451-3455, 694=3456-3460, 695=3461-3465, 696=3466-3470, 697=3471-3475, 698=3476-3480, 699=3481-3485, 700=3486-3490, 701=3491-3495, 702=3496-3500, 703=3501-3505, 704=3506-3510, 705=3511-3515, 706=3516-3520, 707=3521-3525, 708=3526-3530, 709=3531-3535, 710=3536-3540, 711=3541-3545, 712=3546-3550, 713=3551-3555, 714=3556-3560, 715=3561-3565, 716=3566-3570, 717=3571-3575, 718=3576-3580, 719=3581-3585, 720=3586-3590, 721=3591-3595, 722=3596-3600, 723=3601-3605, 724=3606-3610, 725=3611-3615, 726=3616-3620, 727=3621-3625, 728=3626-3630, 729=3631-3635, 730=3636-3640, 731=3641-3645, 732=3646-3650, 733=3651-3655, 734=3656-3660, 735=3661-3665, 736=3666-3670, 737=3671-3675, 738=3676-3680, 739=3681-3685, 740=3686-3690, 741=3691-3695, 742=3696-3700, 743=3701-3705, 744=3706-3710, 745=3711-3715, 746=3716-3720, 747=3721-3725, 748=3726-3730, 749=3731-3735, 750=3736-3740, 751=3741-3745, 752=3746-3750, 753=3751-3755, 754=3756-3760, 755=3761-3765, 756=3766-3770, 757=3771-3775, 758=3776-3780, 759=3781-3785, 760=3786-3790, 761=3791-3795, 762=3796-3800, 763=3801-3805, 764=3806-3810, 765=3811-3815, 766=3816-3820, 767=3821-3825, 768=3826-3830, 769=3831-3835, 770=3836-3840, 771=3841-3845, 772=3846-3850, 773=3851-3855, 774=3856-3860, 775=3861-3865, 776=3866-3870, 777=3871-3875, 778=3876-3880, 779=3881-3885, 780=3886-3890, 781=3891-3895, 782=3896-3900, 783=3901-3905, 784=3906-3910, 785=3911-3915, 786=3916-3920, 787=3921-3925, 788=3926-3930, 789=3931-3935, 790=3936-3940, 791=3941-3945, 792=3946-3950, 793=3951-3955, 794=3956-3960, 795=3961-3965, 796=3966-3970, 797=3971-3975, 798=3976-3980, 799=3981-3985, 800=3986-3990, 801=3991-3995, 802=3996-4000, 803=4001-4005, 804=4006-4010, 805=4011-4015, 806=4016-4020, 807=4021-4025, 808=4026-4030, 809=4031-4035, 810=4036-4040, 811=4041-4045, 812=4046-4050, 813=4051-4055, 814=4056-4060, 815=4061-4065, 816=4066-4070, 817=4071-4075, 818=4076-4080, 819=4081-4085, 820=4086-4090, 821=4091-4095, 822=4096-4100, 823=4101-4105, 824=4106-4110, 825=4111-4115, 826=4116-4120, 827=4121-4125, 828=4126-4130, 829=4131-4135, 830=4136-4140, 831=4141-4145, 832=4146-4150, 833=4151-4155, 834=4156-4160, 835=4161-4165, 836=4166-4170, 837=4171-4175, 838=4176-4180, 839=4181-4185, 840=4186-4190, 841=4191-4195, 842=4196-4200, 843=4 |
|-----------|-----|-----------------------------|-----------------------------|-------------------------------------------------------|--------------------------------------------------|-------------------------------|---------------------------------------------------------------------------------------------|------------|------------|-----------------------------|------------|-------------------------------|-------------------------------|---------------------------------------------------------------------------------------------------------------------------------------------------------------------------------------------------------------------------------------------------------------------------------------------------------------------------------------------------------------------------------------------------------------------------------------------------------------------------------------------------------------------------------------------------------------------------------------------------------------------------------------------------------------------------------------------------------------------------------------------------------------------------------------------------------------------------------------------------------------------------------------------------------------------------------------------------------------------------------------------------------------------------------------------------------------------------------------------------------------------------------------------------------------------------------------------------------------------------------------------------------------------------------------------------------------------------------------------------------------------------------------------------------------------------------------------------------------------------------------------------------------------------------------------------------------------------------------------------------------------------------------------------------------------------------------------------------------------------------------------------------------------------------------------------------------------------------------------------------------------------------------------------------------------------------------------------------------------------------------------------------------------------------------------------------------------------------------------------------------------------------------------------------------------------------------------------------------------------------------------------------------------------------------------------------------------------------------------------------------------------------------------------------------------------------------------------------------------------------------------------------------------------------------------------------------------------------------------------------------------------------------------------------------------------------------------------------------------------------------------------------------------------------------------------------------------------------------------------------------------------------------------------------------------------------------------------------------------------------------------------------------------------------------------------------------------------------------------------------------------------------------------------------------------------------------------------------------------------------------------------------------------------------------------------------------------------------------------------------------------------------------------------------------------------------------------------------------------------------------------------------------------------------------------------------------------------------------------------------------------------------------------------------------------------------------------------------------------------------------------------------------------------------------------------------------------------------------------------------------------------------------------------------------------------------------------------------------------------------------------------------------------------------------------------------------------------------------------------------------------------------------------------------------------------------------------------------------------------------------------------------------------------------------------------------------------------------------------------------------------------------------------------------------------------------------------------------------------------------------------------------------------------------------------------------------------------------------------------------------------------------------------------------------------------------------------------------------------------------------------------------------------------------------------------------------------------------------------------------------------------------------------------------------------------------------------------------------------------------------------------------------------------------------------------------------------------------------------------------------------------------------------------------------------------------------------------------------------------------------------------------------------------------------------------------------------------------------------------------------------------------------------------------------------------------------------------------------------------------------------------------------------------------------------------------------------------------------------------------------------------------------------------------------------------------------------------------------------------------------------------------------------------------------------------------------------------------------------------------------------------------------------------------------------------------------------------------------------------------------------------------------------------------------------------------------------------------------------------------------------------------------------------------------------------------------------------------------------------------------------------------------------------------------------------------------------------------------------------------------------------------------------------------------------------------------------------------------------------------------------------------------------------------------------------------------------------------------------------------------------------------------------------------------------------------------------------------------------------------------------------------------------------------------------------------------------------------------------------------------------------------------------------------------------------------------------------------------------------------------------------------------------------------------------------------------------------------------------------------------------------------------------------------------------------------------------------------------------------------------------------------------------------------------------------------------------------------------------------------------------------------------------------------------------------------------------------------------------------------------------------------------------------------------------------------------------------------------------------------------------------------------------------------------------------------------------------------------------------------------------------------------------------------------------------------------------------------------------------------------------------------------------------------------------------------------------------------------------------------------------------------------------------------------------------------------------------------------------------------------------------------------------------------------------------------------------------------------------------------------------------------------------------------------------------------------------------------------------------------------------------------------------------------------------------------------------------------------------------------------------------------------------------------------------------------------------------------------------------------------------------------------------------------------------------------------------------------------------------------------------------------------------------------------------------------------------------------------------------------------------------------------------------------------------------------------------------------------------------------------------------------------------------------------------------------------------------------------------------------------------------------------------------------------------------------------------------------------------------------------------------------------------------------------------------------------------------------------------------------------------------------------------------------------------------------------------------------------------------------------------------------------------------------------------------------------------------------------------------------------------------------------------------------------------------------------------------------------------------------------------------------------------------------------------------------------------------------------------------------------------------------------------------------------------------------------------------------------------------------------------------------------------------------------------------------------------------------------------------------------------------------------------------------------------------------------------------------------------------------------------------------------------------------------------------------------------------------------------------------------------------------------------------------------------------------------------------------------------------------------------------------------------------------------------------------------------------------------------------------------------------------------------------------------------------------------------------------------------------------------------------------------------------------------------------------------------------------------------------------------------------------------------------------------------------------------------------------------------------------------------------------------------------------------------------------------------------------------------------------------------------------------------------------------------------------------------------------------------------------------------------------------------------------------------------------------------------------------------------------------------------------------------------------------------------------------------------------------------------------------------------------------------------------------------------------------------------------------------------------------------------------------------------------------------------------------------------------------------------------------------------------------------------------------------------------------------------------------------------------------------------------------------------------------------------------------------------------------------------------------------------------------------------------------------------------------------------------------------------------------------------------------------------------------------------------------------------------------------------------------------------------------------------------------------------------------------------------------------------------------------------------------------------------------------------------------------------------------------------------------------------------------------------------------------------------------------------------------------|
|-----------|-----|-----------------------------|-----------------------------|-------------------------------------------------------|--------------------------------------------------|-------------------------------|---------------------------------------------------------------------------------------------|------------|------------|-----------------------------|------------|-------------------------------|-------------------------------|---------------------------------------------------------------------------------------------------------------------------------------------------------------------------------------------------------------------------------------------------------------------------------------------------------------------------------------------------------------------------------------------------------------------------------------------------------------------------------------------------------------------------------------------------------------------------------------------------------------------------------------------------------------------------------------------------------------------------------------------------------------------------------------------------------------------------------------------------------------------------------------------------------------------------------------------------------------------------------------------------------------------------------------------------------------------------------------------------------------------------------------------------------------------------------------------------------------------------------------------------------------------------------------------------------------------------------------------------------------------------------------------------------------------------------------------------------------------------------------------------------------------------------------------------------------------------------------------------------------------------------------------------------------------------------------------------------------------------------------------------------------------------------------------------------------------------------------------------------------------------------------------------------------------------------------------------------------------------------------------------------------------------------------------------------------------------------------------------------------------------------------------------------------------------------------------------------------------------------------------------------------------------------------------------------------------------------------------------------------------------------------------------------------------------------------------------------------------------------------------------------------------------------------------------------------------------------------------------------------------------------------------------------------------------------------------------------------------------------------------------------------------------------------------------------------------------------------------------------------------------------------------------------------------------------------------------------------------------------------------------------------------------------------------------------------------------------------------------------------------------------------------------------------------------------------------------------------------------------------------------------------------------------------------------------------------------------------------------------------------------------------------------------------------------------------------------------------------------------------------------------------------------------------------------------------------------------------------------------------------------------------------------------------------------------------------------------------------------------------------------------------------------------------------------------------------------------------------------------------------------------------------------------------------------------------------------------------------------------------------------------------------------------------------------------------------------------------------------------------------------------------------------------------------------------------------------------------------------------------------------------------------------------------------------------------------------------------------------------------------------------------------------------------------------------------------------------------------------------------------------------------------------------------------------------------------------------------------------------------------------------------------------------------------------------------------------------------------------------------------------------------------------------------------------------------------------------------------------------------------------------------------------------------------------------------------------------------------------------------------------------------------------------------------------------------------------------------------------------------------------------------------------------------------------------------------------------------------------------------------------------------------------------------------------------------------------------------------------------------------------------------------------------------------------------------------------------------------------------------------------------------------------------------------------------------------------------------------------------------------------------------------------------------------------------------------------------------------------------------------------------------------------------------------------------------------------------------------------------------------------------------------------------------------------------------------------------------------------------------------------------------------------------------------------------------------------------------------------------------------------------------------------------------------------------------------------------------------------------------------------------------------------------------------------------------------------------------------------------------------------------------------------------------------------------------------------------------------------------------------------------------------------------------------------------------------------------------------------------------------------------------------------------------------------------------------------------------------------------------------------------------------------------------------------------------------------------------------------------------------------------------------------------------------------------------------------------------------------------------------------------------------------------------------------------------------------------------------------------------------------------------------------------------------------------------------------------------------------------------------------------------------------------------------------------------------------------------------------------------------------------------------------------------------------------------------------------------------------------------------------------------------------------------------------------------------------------------------------------------------------------------------------------------------------------------------------------------------------------------------------------------------------------------------------------------------------------------------------------------------------------------------------------------------------------------------------------------------------------------------------------------------------------------------------------------------------------------------------------------------------------------------------------------------------------------------------------------------------------------------------------------------------------------------------------------------------------------------------------------------------------------------------------------------------------------------------------------------------------------------------------------------------------------------------------------------------------------------------------------------------------------------------------------------------------------------------------------------------------------------------------------------------------------------------------------------------------------------------------------------------------------------------------------------------------------------------------------------------------------------------------------------------------------------------------------------------------------------------------------------------------------------------------------------------------------------------------------------------------------------------------------------------------------------------------------------------------------------------------------------------------------------------------------------------------------------------------------------------------------------------------------------------------------------------------------------------------------------------------------------------------------------------------------------------------------------------------------------------------------------------------------------------------------------------------------------------------------------------------------------------------------------------------------------------------------------------------------------------------------------------------------------------------------------------------------------------------------------------------------------------------------------------------------------------------------------------------------------------------------------------------------------------------------------------------------------------------------------------------------------------------------------------------------------------------------------------------------------------------------------------------------------------------------------------------------------------------------------------------------------------------------------------------------------------------------------------------------------------------------------------------------------------------------------------------------------------------------------------------------------------------------------------------------------------------------------------------------------------------------------------------------------------------------------------------------------------------------------------------------------------------------------------------------------------------------------------------------------------------------------------------------------------------------------------------------------------------------------------------------------------------------------------------------------------------------------------------------------------------------------------------------------------------------------------------------------------------------------------------------------------------------------------------------------------------------------------------------------------------------------------------------------------------------------------------------------------------------------------------------------------------------------------------------------------------------------------------------------------------------------------------------------------------------------------------------------------------------------------------------------------------------------------------------------------------------------------------------------------------------------------------------------------------------------------------------------------------------------------------------------------------------------------------------------------------------------------------------------------------------------------------------------------------------------------------------------------------------------|

|          |          |    |   |   |   |   |    |               |   |          |   |          |                   |      |           |      |              |              |
|----------|----------|----|---|---|---|---|----|---------------|---|----------|---|----------|-------------------|------|-----------|------|--------------|--------------|
| PNAS 312 | PNAS 312 | 47 | 1 | 2 | 2 | 0 | 0  | local only    | 0 | 109.2402 | 0 | 109.2402 | Luminal B         | Good | Activated | high | high         | high         |
| PNAS 313 | PNAS 313 | 43 | 1 | 1 | 2 | 0 | 0  | local only    | 1 | 72.67351 | 0 | 72.67351 | Normal Breast-lik | Good | Activated | low  | high         | low          |
| PNAS 314 | PNAS 314 | 39 | 1 | 1 | 2 | 1 | 2  | local only    | 1 | 38.63655 | 1 | 60.71458 | Luminal B         | Poor | Activated | high | high         | high         |
| PNAS 315 | PNAS 315 | 40 | 1 | 1 | 1 | 1 | 1  | chemo only    | 0 | 98.89117 | 0 | 98.89117 | Luminal A         | Good | Quiescent | high | high         | low          |
| PNAS 318 | PNAS 318 | 37 | 1 | 1 | 1 | 1 | 2  | local only    | 1 | 28.02484 | 0 | 29.20739 | Luminal A         | Poor | Quiescent | low  | intermediate | high         |
| PNAS 319 | PNAS 319 | 49 | 1 | 2 | 0 | 0 | 0  | local only    | 1 | 76.45175 | 1 | 76.45175 | HER2+ER-          | Poor | Activated | high | high         | high         |
| PNAS 320 | PNAS 320 | 44 | 1 | 1 | 3 | 1 | 1  | chemo only    | 0 | 118.7351 | 0 | 118.7351 | Basal-like        | Poor | Activated | high | high         | low          |
| PNAS 321 | PNAS 321 | 39 | 1 | 2 | 2 | 2 | 9  | local only    | 1 | 18.00411 | 0 | 21.42098 | Normal Breast-lik | Poor | Activated | high | high         | low          |
| PNAS 322 | PNAS 322 | 45 | 1 | 2 | 1 | 0 | 0  | chemo only    | 0 | 80.9096  | 0 | 80.9096  | Luminal B         | Good | Activated | low  | high         | high         |
| PNAS 323 | PNAS 323 | 41 | 1 | 2 | 1 | 0 | 0  | local only    | 0 | 105.6263 | 0 | 105.6263 | Luminal A         | Good | Quiescent | low  | low          | low          |
| PNAS 324 | PNAS 324 | 46 | 0 | 2 | 3 | 1 | 2  | chemo only    | 0 | 106.3162 | 0 | 106.3162 | Basal-like        | Poor | Activated | low  | high         | low          |
| PNAS 325 | PNAS 325 | 42 | 1 | 2 | 3 | 2 | 8  | chemo only    | 0 | 105.2505 | 0 | 105.2505 | Basal-like        | Good | Activated | low  | high         | low          |
| PNAS 326 | PNAS 326 | 39 | 0 | 2 | 3 | 2 | 0  | local only    | 0 | 99.58111 | 0 | 99.58111 | Basal-like        | Poor | Activated | high | high         | low          |
| PNAS 327 | PNAS 327 | 49 | 1 | 1 | 2 | 1 | 2  | chemo only    | 1 | 55.45791 | 0 | 73.13347 | Luminal B         | Poor | Activated | low  | high         | high         |
| PNAS 328 | PNAS 328 | 41 | 1 | 1 | 1 | 1 | 1  | chemo only    | 0 | 66.92402 | 0 | 66.92402 | Luminal A         | Good | Activated | low  | low          | low          |
| PNAS 329 | PNAS 329 | 49 | 1 | 2 | 1 | 0 | 0  | local only    | 1 | 25.95057 | 0 | 25.95057 | Luminal B         | Good | Activated | low  | high         | high         |
| PNAS 330 | PNAS 330 | 26 | 0 | 1 | 3 | 2 | 13 | chemo only    | 0 | 62.39014 | 0 | 62.39014 | Basal-like        | Poor | Activated | low  | high         | high         |
| PNAS 331 | PNAS 331 | 48 | 1 | 1 | 1 | 0 | 0  | local only    | 1 | 25.8912  | 1 | 30.09446 | Luminal B         | Poor | Activated | low  | high         | high         |
| PNAS 332 | PNAS 332 | 49 | 0 | 2 | 3 | 1 | 1  | chemo only    | 0 | 95.90144 | 0 | 95.90144 | Basal-like        | Poor | Activated | low  | high         | high         |
| PNAS 333 | PNAS 333 | 44 | 0 | 2 | 3 | 0 | 0  | local only    | 0 | 101.9466 | 0 | 101.9466 | HER2+ER-          | Poor | Activated | low  | high         | high         |
| PNAS 334 | PNAS 334 | 36 | 1 | 2 | 2 | 1 | 1  | chemo only    | 0 | 92.32033 | 0 | 92.32033 | Luminal A         | Good | Activated | low  | intermediate | intermediate |
| PNAS 335 | PNAS 335 | 48 | 0 | 3 | 1 | 1 | 1  | chemo only    | 0 | 89.72485 | 0 | 89.72485 | Basal-like        | Poor | Activated | low  | high         | high         |
| PNAS 336 | PNAS 336 | 47 | 1 | 1 | 1 | 0 | 0  | local only    | 0 | 88.90349 | 0 | 88.90349 | Luminal A         | Good | Activated | low  | intermediate | low          |
| PNAS 337 | PNAS 337 | 29 | 1 | 1 | 1 | 1 | 2  | chemo only    | 1 | 25.03491 | 0 | 81.83984 | Luminal A         | Poor | Activated | low  | high         | high         |
| PNAS 338 | PNAS 338 | 49 | 0 | 1 | 3 | 0 | 0  | chemo only    | 0 | 76.1232  | 0 | 76.1232  | Basal-like        | Poor | Activated | high | high         | high         |
| PNAS 339 | PNAS 339 | 45 | 1 | 2 | 0 | 0 | 0  | chemo only    | 0 | 199.0965 | 0 | 199.0965 | Luminal B         | Poor | Activated | low  | high         | high         |
| PNAS 340 | PNAS 340 | 43 | 1 | 2 | 2 | 1 | 1  | chemo only    | 1 | 37.4538  | 1 | 70.30801 | Luminal B         | Poor | Activated | low  | high         | high         |
| PNAS 341 | PNAS 341 | 46 | 0 | 2 | 2 | 2 | 4  | chemo only    | 1 | 20.79671 | 1 | 28.35318 | HER2+ER-          | Poor | Activated | high | high         | low          |
| PNAS 342 | PNAS 342 | 43 | 1 | 1 | 1 | 0 | 1  | local only    | 0 | 73.006   | 0 | 73.006   | Luminal A         | Good | Quiescent | low  | high         | low          |
| PNAS 343 | PNAS 343 | 44 | 0 | 1 | 1 | 0 | 0  | chemo only    | 0 | 82.49692 | 0 | 82.49692 | Basal-like        | Poor | Activated | high | high         | low          |
| PNAS 344 | PNAS 344 | 44 | 0 | 1 | 1 | 0 | 0  | local only    | 0 | 83.94251 | 0 | 83.94251 | Luminal A         | Good | Activated | low  | low          | low          |
| PNAS 345 | PNAS 345 | 47 | 1 | 2 | 2 | 2 | 4  | chemo only    | 0 | 83.94251 | 0 | 83.94251 | Luminal A         | Good | Activated | low  | low          | low          |
| PNAS 346 | PNAS 346 | 45 | 1 | 2 | 1 | 1 | 1  | chemo only    | 0 | 85.64066 | 0 | 85.64066 | Luminal A         | Good | Activated | low  | low          | low          |
| PNAS 347 | PNAS 347 | 41 | 1 | 1 | 1 | 2 | 11 | tam only      | 0 | 56.64066 | 0 | 56.64066 | Normal Breast-lik | Good | Activated | high | high         | high         |
| PNAS 348 | PNAS 348 | 50 | 1 | 2 | 0 | 0 | 0  | local only    | 0 | 74.05339 | 0 | 74.05339 | Luminal A         | Good | Activated | low  | high         | high         |
| PNAS 349 | PNAS 349 | 45 | 1 | 2 | 2 | 0 | 0  | chemo and tam | 0 | 77.58979 | 0 | 77.58979 | Luminal A         | Good | Quiescent | low  | high         | high         |
| PNAS 350 | PNAS 350 | 41 | 1 | 1 | 3 | 1 | 2  | high on tam   | 0 | 39.42053 | 0 | 39.42053 | Basal-like        | Poor | Activated | high | high         | high         |
| PNAS 351 | PNAS 351 | 41 | 1 | 1 | 3 | 1 | 2  | chemo only    | 0 | 78.32444 | 0 | 78.32444 | HER2+ER-          | Poor | Activated | high | high         | high         |
| PNAS 352 | PNAS 352 | 43 | 1 | 2 | 2 | 0 | 0  | local only    | 0 | 69.71663 | 0 | 69.71663 | Luminal A         | Good | Activated | low  | high         | high         |
| PNAS 353 | PNAS 353 | 48 | 0 | 1 | 3 | 1 | 3  | chemo only    | 1 | 73.92197 | 0 | 73.92197 | Luminal B         | Poor | Activated | low  | high         | high         |
| PNAS 354 | PNAS 354 | 47 | 1 | 2 | 3 | 0 | 0  | local only    | 0 | 73.92197 | 0 | 73.92197 | Luminal A         | Poor | Quiescent | high | intermediate | high         |
| PNAS 355 | PNAS 355 | 50 | 1 | 2 | 0 | 0 | 0  | chemo only    | 0 | 72.54209 | 0 | 72.54209 | Normal Breast-lik | Good | Activated | high | high         | high         |
| PNAS 356 | PNAS 356 | 40 | 0 | 1 | 2 | 0 | 0  | local only    | 0 | 74.57906 | 0 | 74.57906 | Luminal A         | Good | Activated | low  | low          | low          |
| PNAS 357 | PNAS 357 | 38 | 1 | 1 | 1 | 2 | 2  | chemo and tam | 0 | 69.8959  | 0 | 69.8959  | Luminal A         | Good | Activated | low  | low          | low          |
| PNAS 358 | PNAS 358 | 45 | 1 | 1 | 1 | 0 | 0  | local only    | 0 | 74.87474 | 0 | 74.87474 | Luminal A         | Good | Activated | high | high         | high         |
| PNAS 359 | PNAS 359 | 49 | 1 | 2 | 1 | 1 | 1  | tam only      | 0 | 72.21355 | 0 | 72.21355 | Normal Breast-lik | Poor | Activated | high | intermediate | intermediate |
| PNAS 360 | PNAS 360 | 42 | 1 | 1 | 1 | 1 | 1  | chemo and tam | 0 | 66.56429 | 0 | 66.56429 | Luminal B         | Good | Quiescent | low  | intermediate | intermediate |
| PNAS 361 | PNAS 361 | 42 | 1 | 1 | 1 | 1 | 1  | chemo and tam | 0 | 64.16427 | 0 | 64.16427 | Luminal A         | Good | Quiescent | low  | low          | low          |
| PNAS 362 | PNAS 362 | 46 | 1 | 2 | 3 | 2 | 5  | chemo and tam | 0 | 63.11294 | 0 | 63.11294 | Luminal B         | Poor | Activated | high | high         | high         |
| PNAS 363 | PNAS 363 | 42 | 1 | 1 | 1 | 1 | 5  | chemo and tam | 1 | 59.1493  | 0 | 59.1493  | Luminal B         | Poor | Activated | low  | high         | high         |
| PNAS 364 | PNAS 364 | 49 | 0 | 1 | 2 | 0 | 0  | local only    | 0 | 216.9692 | 0 | 216.9692 | Normal Breast-lik | Poor | Quiescent | high | high         | high         |
| PNAS 365 | PNAS 365 | 51 | 1 | 2 | 0 | 0 | 0  | local only    | 0 | 209.8398 | 0 | 209.8398 | Luminal A         | Good | Activated | low  | low          | low          |
| PNAS 366 | PNAS 366 | 50 | 1 | 2 | 0 | 0 | 0  | local only    | 0 | 205.6316 | 0 | 205.6316 | Luminal A         | Poor | Quiescent | high | high         | high         |
| PNAS 367 | PNAS 367 | 49 | 1 | 2 | 2 | 0 | 0  | local only    | 0 | 6.86653  | 1 | 11.6881  | Basal-like        | Poor | Activated | high | high         | high         |
| PNAS 368 | PNAS 368 | 33 | 1 | 2 | 2 | 0 | 0  | local only    | 0 | 114.8255 | 0 | 202.4478 | Normal Breast-lik | Poor | Activated | low  | high         | high         |
| PNAS 369 | PNAS 369 | 39 | 0 | 1 | 2 | 0 | 0  | local only    | 1 | 39.09651 | 1 | 78.8601  | HER2+ER-          | Poor | Activated | high | high         | low          |
| PNAS 370 | PNAS 370 | 51 | 1 | 2 | 1 | 2 | 1  | local only    | 0 | 112.9636 | 0 | 112.9636 | Normal Breast-lik | Good | Activated | high | low          | low          |
| PNAS 371 | PNAS 371 | 51 | 1 | 2 | 2 | 1 | 1  | chemo only    | 0 | 93.2731  | 0 | 93.2731  | Luminal B         | Poor | Activated | high | intermediate | low          |
| PNAS 372 | PNAS 372 | 52 | 1 | 1 | 1 | 1 | 1  | chemo only    | 1 | 32.16427 | 1 | 69.09955 | Luminal B         | Poor | Activated | high | high         | high         |
| PNAS 373 | PNAS 373 | 52 | 0 | 1 | 3 | 2 | 6  | chemo only    | 0 | 209.8113 | 0 | 209.8113 | HER2+ER-          | Poor | Activated | high | high         | low          |
| PNAS 374 | PNAS 374 | 52 | 0 | 1 | 3 | 2 | 6  | chemo only    | 1 | 102.3409 | 1 | 114.3655 | Basal-like        | Poor | Activated | high | high         | high         |
| PNAS 375 | PNAS 375 | 52 | 1 | 2 | 3 | 1 | 1  | tam only      | 0 | 167.0308 | 0 | 167.0308 | Luminal B         | Poor | Activated | high | high         | high         |
| PNAS 376 | PNAS 376 | 52 | 1 | 1 | 1 | 1 | 1  | local only    | 1 | 93.2731  | 1 | 102.3409 | Luminal B         | Poor | Activated | high | high         | high         |
| PNAS 377 | PNAS 377 | 52 | 1 | 2 | 1 | 1 | 1  | chemo only    | 0 | 132.9938 | 0 | 132.9938 | Luminal A         | Good | Activated | low  | high         | high         |
| PNAS 378 | PNAS 378 | 52 | 1 | 2 | 3 | 1 | 1  | tam only      | 0 | 21.35934 | 1 | 34.66119 | Luminal B         | Poor | Activated | high | high         | high         |
| PNAS 379 | PNAS 379 | 52 | 1 | 2 | 1 | 1 | 1  | tam only      | 0 | 98.56263 | 0 | 98.56263 | Luminal A         | Poor | Activated | low  | high         | high         |
| PNAS 380 | PNAS 380 | 51 | 1 | 2 | 3 | 2 | 4  | high on tam   | 0 | 86.70226 | 0 | 86.70226 | Luminal A         | Poor | Activated | high | high         | high         |
| PNAS 381 | PNAS 381 | 51 | 1 | 2 | 3 | 2 | 4  | tam only      | 0 | 41.03491 | 1 | 59.36756 | Luminal B         | Poor | Activated | high | high         | high         |
| PNAS 382 | PNAS 382 | 51 | 1 | 1 | 1 | 1 | 1  | tam only      | 0 | 81.64271 | 0 | 81.64271 | Luminal A         | Good | Activated | low  | low          | low          |
| PNAS 383 | PNAS 383 | 51 | 1 | 1 | 1 | 1 | 1  | chemo only    | 0 | 81.64271 | 0 | 81.64271 | Luminal A         | Good | Activated | low  | intermediate | low          |
| PNAS 384 | PNAS 384 | 51 | 1 | 1 | 1 | 1 | 2  | tam only      | 0 | 74.05339 | 0 | 74.05339 | HER2+ER-          | Poor | Activated | high | high         | high         |
| PNAS 385 | PNAS 385 | 51 | 1 | 2 | 1 | 1 | 1  | chemo only    | 0 | 66.89117 | 0 | 66.89117 | Luminal B         | Poor | Activated | low  | high         | high         |
| PNAS 386 | PNAS 386 | 51 | 1 | 2 | 1 | 1 | 2  | local only    | 0 | 68.59103 | 0 | 68.59103 | Luminal B         | Good | Quiescent | high | intermediate | intermediate |
| PNAS 387 | PNAS 387 | 51 | 1 | 2 | 2 | 2 | 11 | local only    | 0 | 134.539  | 0 | 180.9281 | Luminal A         | Good | Activated | high | intermediate | low          |
| PNAS 388 | PNAS 388 | 51 | 0 | 2 | 3 | 1 | 2  | tam only      | 0 | 122.7762 | 0 | 122.7762 | HER2+ER-          | Poor | Activated | high | high         | high         |
| PNAS 389 | PNAS 389 | 47 | 0 | 1 | 1 | 0 | 0  | local only    | 0 | 88.54209 | 0 | 88.54209 | Basal-like        | Poor | Activated | high | high         | intermediate |
| PNAS 390 | PNAS 390 | 40 | 1 | 1 | 1 | 1 | 3  | chemo only    | 0 | 81.132   | 0 | 81.132   | Luminal A         | Good | Activated | high | low          | intermediate |
| PNAS 391 | PNAS 391 | 39 | 1 | 1 | 1 | 1 | 3  | local only    | 0 | 90.84189 | 0 | 90.84189 | Luminal A         | Good | Activated | high | low          | intermediate |
| PNAS 392 | PNAS 392 | 43 | 1 | 2 | 2 | 0 | 0  | local only    | 0 | 177.807  | 0 | 177.807  | Luminal A         | Good | Activated | high | low          | low          |
| PNAS 393 | PNAS 393 | 42 | 0 | 2 | 3 | 0 | 0  | local only    | 0 | 79.2717  | 0 | 79.2717  | Luminal A         | Good | Activated | low  | high         | intermediate |
| PNAS 394 | PNAS 394 | 42 | 0 | 2 | 3 | 0 | 0  | local only    | 0 | 59.43326 | 1 | 59.43326 | Basal-like        | Poor | Activated | high | high         | high         |
| PNAS 395 | PNAS 395 | 43 | 1 | 2 | 2 | 0 | 0  | local only    | 1 | 57.19918 | 1 | 105.2648 | Luminal A         | Poor | Activated | high | intermediate | intermediate |
| PNAS 396 | PNAS 396 | 41 | 0 | 1 | 3 | 0 | 0  | tam only      | 0 | 15.49281 | 0 | 41.4028  | Luminal B         | Poor | Activated | high | high         | high         |
| PNAS 397 | PNAS 397 | 41 | 0 | 1 | 3 | 0 | 0  | local only    |   |          |   |          |                   |      |           |      |              |              |

**Supplemental Table 2.** Multivariate Cox proportional hazards analysis of (A) standard clinical prognostic factors alone, or with (B) the 70-gene predictor, (C) Wound-response predictor, (D) Ma *et al.* 2-gene ratio predictor, (E) Recurrence Score, or (F) Intrinsic Subtypes in relation to Relapse-Free Survival and Overall Survival for the 295-sample Chang *et al.* 2005 dataset. Size was a binary variable (0= diameter of 2cm or less, 1= greater than 2cm); age was a continuous variable formatted as decade-years; hazard ratios for Intrinsic Subtypes were calculated relative to the Luminal A subtype. Variables found to be significant (p<0.05) in the Cox proportional hazards model are shown in bold.

| <b>A.</b>                                        |                              |                  |                              |                  |
|--------------------------------------------------|------------------------------|------------------|------------------------------|------------------|
| <b>Variable</b>                                  | <b>Relapse-Free survival</b> |                  | <b>Overall survival</b>      |                  |
|                                                  | <b>Hazard Ratio (95% CI)</b> | <b>p-value</b>   | <b>Hazard Ratio (95% CI)</b> | <b>p-value</b>   |
| Age, per decade                                  | <b>0.59</b> (0.43-0.82)      | <b>0.001</b>     | <b>0.67</b> (0.45-0.98)      | <b>0.042</b>     |
| ER status                                        | <b>0.65</b> (0.42-0.99)      | <b>0.045</b>     | <b>0.44</b> (0.27-0.71)      | <b>0.001</b>     |
| Tumor grade 2 vs. 1                              | <b>2.45</b> (1.33-4.50)      | <b>0.004</b>     | <b>4.31</b> (1.49-12.47)     | <b>0.007</b>     |
| Tumor grade 3 vs. 1                              | <b>2.53</b> (1.35-4.74)      | <b>0.004</b>     | <b>5.96</b> (2.06-17.21)     | <b>0.001</b>     |
| Size                                             | 1.40 (0.96-2.05)             | 0.083            | 1.52 (0.94-2.43)             | 0.086            |
| 1-3 vs. 0 positive nodes                         | 1.32 (0.72-2.41)             | 0.37             | 1.06 (0.48-2.36)             | 0.88             |
| >3 vs. 0 positive nodes                          | <b>2.24</b> (1.12-4.49)      | <b>0.023</b>     | 1.85 (0.78-4.38)             | 0.16             |
| Hormonal or chemotherapy vs. no adjuvant therapy | 0.56 (0.31-1.01)             | 0.055            | 0.81 (0.38-1.74)             | 0.59             |
| <b>B.</b>                                        |                              |                  |                              |                  |
| <b>Variable</b>                                  | <b>Relapse-Free survival</b> |                  | <b>Overall survival</b>      |                  |
|                                                  | <b>Hazard Ratio (95% CI)</b> | <b>p-value</b>   | <b>Hazard Ratio (95% CI)</b> | <b>p-value</b>   |
| Age, per decade                                  | <b>0.64</b> (0.46-0.88)      | <b>0.006</b>     | 0.71 (0.48-1.05)             | 0.085            |
| ER status                                        | 0.86 (0.56-1.31)             | 0.47             | <b>0.59</b> (0.36-0.95)      | <b>0.031</b>     |
| Tumor grade 2 vs. 1                              | 1.57 (0.82-2.97)             | 0.17             | 2.55 (0.86-7.63)             | 0.093            |
| Tumor grade 3 vs. 1                              | 1.32 (0.68-2.59)             | 0.41             | 2.84 (0.94-8.54)             | 0.064            |
| Size                                             | 1.44 (0.99-2.11)             | 0.059            | 1.58 (0.98-2.53)             | 0.058            |
| 1-3 vs. 0 positive nodes                         | 1.20 (0.66-2.18)             | 0.55             | 1.01 (0.46-2.21)             | 0.97             |
| >3 vs. 0 positive nodes                          | <b>2.19</b> (1.07-4.47)      | <b>0.032</b>     | 1.97 (0.81-4.79)             | 0.14             |
| Hormonal or chemotherapy vs. no adjuvant therapy | <b>0.54</b> (0.30-0.99)      | <b>0.048</b>     | 0.75 (0.34-1.62)             | 0.46             |
| 70-gene predictor (poor vs. good)                | <b>3.44</b> (1.98-5.99)      | <b>&lt;0.001</b> | <b>4.71</b> (2.02-11.00)     | <b>&lt;0.001</b> |

**C.**

| Variable                                           | Relapse-Free survival   |                  | Overall survival         |              |
|----------------------------------------------------|-------------------------|------------------|--------------------------|--------------|
|                                                    | Hazard Ratio (95% CI)   | p-value          | Hazard Ratio (95% CI)    | p-value      |
| Age, per decade                                    | <b>0.56</b> (0.40-0.77) | <b>&lt;0.001</b> | <b>0.62</b> (0.41-0.92)  | <b>0.019</b> |
| ER status                                          | 0.69 (0.45-1.06)        | 0.089            | <b>0.46</b> (0.28-0.76)  | <b>0.002</b> |
| Tumor grade 2 vs. 1                                | <b>1.89</b> (1.02-3.52) | <b>0.045</b>     | <b>3.32</b> (1.13-9.71)  | <b>0.028</b> |
| Tumor grade 3 vs. 1                                | <b>1.92</b> (1.02-3.62) | <b>0.045</b>     | <b>4.46</b> (1.53-13.00) | <b>0.006</b> |
| Size                                               | 1.39 (0.95-2.03)        | 0.090            | 1.52 (0.95-2.44)         | 0.083        |
| 1-3 vs. 0 positive nodes                           | 1.19 (0.65-2.17)        | 0.58             | 0.96 (0.43-2.12)         | 0.92         |
| >3 vs. 0 positive nodes                            | 1.74 (0.85-3.57)        | 0.13             | 1.48 (0.61-3.59)         | 0.38         |
| Hormonal or chemotherapy vs. no adjuvant therapy   | 0.58 (0.32-1.07)        | 0.080            | 0.84 (0.39-1.81)         | 0.65         |
| Wound-response signature (activated vs. quiescent) | <b>2.88</b> (1.50-5.52) | <b>0.002</b>     | <b>3.25</b> (1.27-8.27)  | <b>0.014</b> |

**D.**

| Variable                                         | Relapse-Free survival   |              | Overall survival         |              |
|--------------------------------------------------|-------------------------|--------------|--------------------------|--------------|
|                                                  | Hazard Ratio (95% CI)   | p-value      | Hazard Ratio (95% CI)    | p-value      |
| Age, per decade                                  | <b>0.60</b> (0.43-0.82) | <b>0.001</b> | <b>0.67</b> (0.45-0.98)  | <b>0.042</b> |
| ER status                                        | <b>0.63</b> (0.41-0.98) | <b>0.040</b> | <b>0.44</b> (0.26-0.72)  | <b>0.001</b> |
| Tumor grade 2 vs. 1                              | <b>2.43</b> (1.32-4.47) | <b>0.004</b> | <b>4.31</b> (1.49-12.48) | <b>0.007</b> |
| Tumor grade 3 vs. 1                              | <b>2.57</b> (1.37-4.82) | <b>0.003</b> | <b>5.96</b> (2.06-17.23) | <b>0.001</b> |
| Size                                             | 1.40 (0.96-2.05)        | 0.082        | 1.52 (0.94-2.43)         | 0.086        |
| 1-3 vs. 0 positive nodes                         | 1.32 (0.72-2.42)        | 0.36         | 1.06 (0.48-2.36)         | 0.88         |
| >3 vs. 0 positive nodes                          | <b>2.26</b> (1.13-4.54) | <b>0.022</b> | 1.85 (0.78-4.38)         | 0.16         |
| Hormonal or chemotherapy vs. no adjuvant therapy | 0.55 (0.30-1.00)        | 0.051        | 0.81 (0.38-1.74)         | 0.59         |
| Ma <i>et al.</i> 2-gene ratio (high vs. low)     | 0.91 (0.61-1.34)        | 0.62         | 1.00 (0.61-1.63)         | 0.99         |

| <b>E.</b><br><b>Variable</b>                        | <b>Relapse-Free survival</b>     |                  | <b>Overall survival</b>          |                |
|-----------------------------------------------------|----------------------------------|------------------|----------------------------------|----------------|
|                                                     | <b>Hazard Ratio<br/>(95% CI)</b> | <b>p-value</b>   | <b>Hazard Ratio<br/>(95% CI)</b> | <b>p-value</b> |
| Age, per decade                                     | <b>0.57</b> (0.42-0.79)          | <b>&lt;0.001</b> | <b>0.63</b> (0.42-0.94)          | <b>0.023</b>   |
| Tumor grade 2 vs. 1                                 | 1.61 (0.85-3.04)                 | 0.14             | 2.95 (0.99-8.73)                 | 0.051          |
| Tumor grade 3 vs. 1                                 | 1.50 (0.79-2.86)                 | 0.21             | <b>3.81</b> (1.30-11.1)          | <b>0.014</b>   |
| Size                                                | <b>1.51</b> (1.03-2.20)          | <b>0.035</b>     | <b>1.66</b> (1.03-2.67)          | <b>0.036</b>   |
| 1-3 vs. 0 positive nodes                            | 1.24 (0.68-2.26)                 | 0.48             | 0.95 (0.43-2.09)                 | 0.90           |
| >3 vs. 0 positive nodes                             | <b>2.10</b> (1.04-4.25)          | <b>0.039</b>     | 1.59 (0.66-3.82)                 | 0.30           |
| Hormonal or chemotherapy<br>vs. no adjuvant therapy | <b>0.54</b> (0.30-0.98)          | <b>0.044</b>     | 0.80 (0.37-1.73)                 | 0.57           |
| Intermediate vs. Low<br>recurrence score            | 1.81 (0.70-4.68)                 | 0.22             | 1.81 (0.39-8.27)                 | 0.45           |
| High vs. Low<br>recurrence score                    | <b>4.27</b> (2.05-8.92)          | <b>&lt;0.001</b> | <b>6.14</b> (1.84-20.4)          | <b>0.003</b>   |

| <b>F.</b><br><b>Variable</b>                        | <b>Relapse-Free survival</b>     |                  | <b>Overall survival</b>          |                |
|-----------------------------------------------------|----------------------------------|------------------|----------------------------------|----------------|
|                                                     | <b>Hazard Ratio<br/>(95% CI)</b> | <b>p-value</b>   | <b>Hazard Ratio<br/>(95% CI)</b> | <b>p-value</b> |
| Age, per decade                                     | <b>0.59</b> (0.42-0.82)          | <b>0.002</b>     | 0.67 (0.45-1.00)                 | 0.051          |
| Tumor grade 2 vs. 1                                 | 1.80 (0.96-3.39)                 | 0.068            | <b>3.51</b> (1.19-10.36)         | <b>0.023</b>   |
| Tumor grade 3 vs. 1                                 | 1.80 (0.92-3.50)                 | 0.087            | <b>4.47</b> (1.48-13.49)         | <b>0.008</b>   |
| Size                                                | <b>1.55</b> (1.05-2.29)          | <b>0.027</b>     | 1.55 (0.96-2.51)                 | 0.076          |
| 1-3 vs. 0 positive nodes                            | 1.20 (0.65-2.21)                 | 0.55             | 1.01 (0.45-2.28)                 | 0.98           |
| >3 vs. 0 positive nodes                             | 2.01 (0.96-4.21)                 | 0.064            | 1.81 (0.73-4.50)                 | 0.20           |
| Hormonal or chemotherapy<br>vs. no adjuvant therapy | <b>0.49</b> (0.26-0.92)          | <b>0.025</b>     | 0.69 (0.31-1.54)                 | 0.37           |
| Luminal B                                           | <b>3.79</b> (2.17-6.61)          | <b>&lt;0.001</b> | <b>2.55</b> (1.25-5.22)          | <b>0.010</b>   |
| Normal-like                                         | <b>2.86</b> (1.49-5.50)          | <b>0.002</b>     | 2.00 (0.76-5.31)                 | 0.16           |
| Her2+/ER-                                           | <b>3.16</b> (1.61-6.18)          | <b>&lt;0.001</b> | <b>3.54</b> (1.59-7.85)          | <b>0.002</b>   |
| Basal-like                                          | <b>2.45</b> (1.33-4.51)          | <b>0.004</b>     | <b>3.05</b> (1.49-6.27)          | <b>0.002</b>   |

**Supplemental Table 3.** Two-way contingency table analysis measuring the association between the 70-gene, Wound-response, and Recurrence Score predictors in the **295-sample** dataset.

**A.**

| Two-way contingency table                                | Wound-Response  |           |
|----------------------------------------------------------|-----------------|-----------|
|                                                          | Quiescent       | Activated |
| 70-gene predictor                                        | (# of patients) |           |
| Good                                                     | 48              | 67        |
| Poor                                                     | 19              | 161       |
| <b>Statistics for two-way contingency table analysis</b> |                 |           |
| p-value†                                                 | <0.001          |           |
| Cramer's V††                                             | 0.36            |           |

**B.**

| Two-way contingency table                                | Recurrence Score |      |
|----------------------------------------------------------|------------------|------|
|                                                          | Low or Int.      | High |
| 70-gene predictor                                        | (# of patients)  |      |
| Good                                                     | 81               | 34   |
| Poor                                                     | 22               | 158  |
| <b>Statistics for two-way contingency table analysis</b> |                  |      |
| p-value†                                                 | <0.001           |      |
| Cramer's V††                                             | 0.60             |      |

**C.**

|                                                          |                                |      |
|----------------------------------------------------------|--------------------------------|------|
| <b>Two-way contingency table</b>                         | <b>Recurrence Score</b>        |      |
|                                                          | Low or Int.<br>(# of patients) | High |
| <b>Wound Response</b>                                    |                                |      |
| Quiescent                                                | 48                             | 19   |
| Activated                                                | 55                             | 173  |
| <b>Statistics for two-way contingency table analysis</b> |                                |      |
| p-value†                                                 | <0.001                         |      |
| Cramer's V††                                             | 0.42                           |      |

† p-value calculated from Chi-square test on contingency table. †† Cramer's V statistic (value can range from 0 to 1) measures the strength of association between the two variables analyzed in the contingency table, with 1 indicating perfect association and 0 indicating no association.

**Supplemental Table 4.** Multivariate Cox proportional hazards analysis of (A) standard clinical prognostic factors alone or with (B) the 70-gene predictor, (C) Wound-response predictor, (D) Ma et al.'s 2-gene predictor, (E) Recurrence Score predictor, or (F) intrinsic subtypes in relation to Relapse-Free Survival and Overall Survival for the 225 ER+ samples in the Chang et al. (2005) dataset. Size was a binary variable (0= diameter of 2cm or less, 1= greater than 2cm); age was a continuous variable formatted as decade-years; hazard ratios for intrinsic subtypes were calculated relative to the Luminal A subtype. Variables found to be significant (p<0.05) in the Cox proportional hazards model are shown in bold.

| <b>Variable</b>                                  | <b>Relapse-Free survival</b> |                | <b>Overall survival</b>      |                  |
|--------------------------------------------------|------------------------------|----------------|------------------------------|------------------|
|                                                  | <b>Hazard Ratio (95% CI)</b> | <b>p-value</b> | <b>Hazard Ratio (95% CI)</b> | <b>p-value</b>   |
| Age, per decade                                  | <b>0.54</b> (0.35-0.82)      | <b>0.005</b>   | <b>0.56</b> (0.31, 0.99)     | <b>0.047</b>     |
| Tumor grade 2 vs. 1                              | <b>2.11</b> (1.12-3.98)      | <b>0.021</b>   | <b>3.28</b> (1.08, 9.94)     | <b>0.035</b>     |
| Tumor grade 3 vs. 1                              | <b>2.83</b> (1.49-5.38)      | <b>0.002</b>   | <b>7.36</b> (2.51, 21.5)     | <b>&lt;0.001</b> |
| Size                                             | 1.41 (0.88-2.26)             | 0.15           | 1.33 (0.71, 2.49)            | 0.36             |
| 1-3 vs. 0 positive nodes                         | <b>2.11</b> (1.06-4.21)      | <b>0.034</b>   | 2.11 (0.81, 5.53)            | 0.13             |
| >3 vs. 0 positive nodes                          | <b>2.92</b> (1.26-6.73)      | <b>0.012</b>   | 2.16 (0.69, 6.72)            | 0.18             |
| Hormonal or chemotherapy vs. no adjuvant therapy | <b>0.37</b> (0.18-0.73)      | <b>0.004</b>   | 0.52 (0.20, 1.32)            | 0.17             |

| <b>Variable</b>                                     | <b>Relapse-Free survival</b>     |                  | <b>Overall survival</b>          |                  |
|-----------------------------------------------------|----------------------------------|------------------|----------------------------------|------------------|
|                                                     | <b>Hazard Ratio<br/>(95% CI)</b> | <b>p-value</b>   | <b>Hazard Ratio<br/>(95% CI)</b> | <b>p-value</b>   |
| Age, per decade                                     | <b>0.65</b> (0.42-0.99)          | <b>0.047</b>     | 0.68 (0.38, 1.22)                | 0.20             |
| Tumor grade 2 vs. 1                                 | 1.24 (0.63-2.44)                 | 0.53             | 1.75 (0.55, 5.55)                | 0.34             |
| Tumor grade 3 vs. 1                                 | 1.20 (0.59-2.48)                 | 0.61             | 2.72 (0.85, 8.66)                | 0.091            |
| Size                                                | 1.45 (0.91-2.31)                 | 0.12             | 1.41 (0.76, 2.61)                | 0.28             |
| 1-3 vs. 0 positive nodes                            | 1.73 (0.88-3.40)                 | 0.11             | 1.81 (0.71, 4.60)                | 0.21             |
| >3 vs. 0 positive nodes                             | <b>2.70</b> (1.12-6.49)          | <b>0.027</b>     | 2.32 (0.69, 7.80)                | 0.17             |
| Hormonal or chemotherapy<br>vs. no adjuvant therapy | <b>0.37</b> (0.18-0.74)          | <b>0.005</b>     | 0.47 (0.18, 1.22)                | 0.12             |
| 70-gene predictor<br>(poor vs. good)                | <b>3.88</b> (2.15-7.02)          | <b>&lt;0.001</b> | <b>5.47</b> (2.13, 14.1)         | <b>&lt;0.001</b> |

| <b>Variable</b>                                     | <b>Relapse-Free survival</b>     |                | <b>Overall survival</b>          |                |
|-----------------------------------------------------|----------------------------------|----------------|----------------------------------|----------------|
|                                                     | <b>Hazard Ratio<br/>(95% CI)</b> | <b>p-value</b> | <b>Hazard Ratio<br/>(95% CI)</b> | <b>p-value</b> |
| Age, per decade                                     | <b>0.50</b> (0.32-0.78)          | <b>0.002</b>   | <b>0.49</b> (0.27, 0.90)         | <b>0.022</b>   |
| Tumor grade 2 vs. 1                                 | 1.60 (0.83-3.05)                 | 0.16           | 2.41 (0.78, 7.39)                | 0.12           |
| Tumor grade 3 vs. 1                                 | <b>2.10</b> (1.09-4.05)          | <b>0.026</b>   | <b>5.24</b> (1.76, 15.6)         | <b>0.003</b>   |
| Size                                                | 1.39 (0.87-2.21)                 | 0.17           | 1.32 (0.71, 2.46)                | 0.38           |
| 1-3 vs. 0 positive nodes                            | 1.87 (0.94-3.73)                 | 0.076          | 1.85 (0.71, 4.82)                | 0.21           |
| >3 vs. 0 positive nodes                             | 2.19 (0.92-5.20)                 | 0.075          | 1.61 (0.50, 5.17)                | 0.42           |
| Hormonal or chemotherapy<br>vs. no adjuvant therapy | <b>0.39</b> (0.20-0.78)          | <b>0.008</b>   | 0.56 (0.22, 1.45)                | 0.23           |
| Wound-response<br>(activated vs. quiescent)         | <b>2.95</b> (1.42-6.14)          | <b>0.004</b>   | <b>4.03</b> (1.20, 13.5)         | <b>0.024</b>   |

| <b>D.</b><br><b>Variable</b>                        | <b>Relapse-Free survival</b>     |                | <b>Overall survival</b>          |                  |
|-----------------------------------------------------|----------------------------------|----------------|----------------------------------|------------------|
|                                                     | <b>Hazard Ratio<br/>(95% CI)</b> | <b>p-value</b> | <b>Hazard Ratio<br/>(95% CI)</b> | <b>p-value</b>   |
| Age, per decade                                     | <b>0.54</b> (0.35-0.84)          | <b>0.006</b>   | <b>0.56</b> (0.31, 0.99)         | <b>0.048</b>     |
| Tumor grade 2 vs. 1                                 | <b>2.08</b> (1.10-3.93)          | <b>0.023</b>   | <b>3.28</b> (1.08, 9.92)         | <b>0.036</b>     |
| Tumor grade 3 vs. 1                                 | <b>2.99</b> (1.55-5.74)          | <b>0.001</b>   | <b>7.42</b> (2.51, 21.9)         | <b>&lt;0.001</b> |
| Size                                                | 1.42 (0.89-2.26)                 | 0.14           | 1.34 (0.72, 2.49)                | 0.36             |
| 1-3 vs. 0 positive nodes                            | <b>2.15</b> (1.08-4.29)          | <b>0.030</b>   | 2.12 (0.80, 5.55)                | 0.13             |
| >3 vs. 0 positive nodes                             | <b>2.99</b> (1.29-6.92)          | <b>0.010</b>   | 2.16 (0.69, 6.70)                | 0.18             |
| Hormonal or chemotherapy<br>vs. no adjuvant therapy | <b>0.36</b> (0.18-0.72)          | <b>0.004</b>   | 0.52 (0.20, 1.32)                | 0.17             |
| Ma <i>et al.</i> 2-gene ratio<br>(high vs. low)     | 0.81 (0.51-1.29)                 | 0.38           | 0.97 (0.52, 1.79)                | 0.91             |

| <b>E.</b><br><b>Variable</b>                        | <b>Relapse-Free survival</b>     |                | <b>Overall survival</b>          |                |
|-----------------------------------------------------|----------------------------------|----------------|----------------------------------|----------------|
|                                                     | <b>Hazard Ratio<br/>(95% CI)</b> | <b>p-value</b> | <b>Hazard Ratio<br/>(95% CI)</b> | <b>p-value</b> |
| Age, per decade                                     | <b>0.49</b> (0.32-0.75)          | <b>0.001</b>   | <b>0.50</b> (0.28, 0.90)         | <b>0.021</b>   |
| Tumor grade 2 vs. 1                                 | 1.42 (0.72, 2.79)                | 0.32           | 1.83 (0.58, 5.77)                | 0.30           |
| Tumor grade 3 vs. 1                                 | 1.69 (0.83, 3.41)                | 0.15           | <b>3.26</b> (1.04, 10.2)         | <b>0.042</b>   |
| Size                                                | 1.52 (0.96, 2.42)                | 0.073          | 1.54 (0.83, 2.86)                | 0.17           |
| 1-3 vs. 0 positive nodes                            | <b>1.97</b> (1.00, 3.87)         | <b>0.049</b>   | 1.75 (0.68, 4.47)                | 0.24           |
| >3 vs. 0 positive nodes                             | <b>3.10</b> (1.32, 7.26)         | <b>0.009</b>   | 2.06 (0.66, 6.39)                | 0.21           |
| Hormonal or chemotherapy<br>vs. no adjuvant therapy | <b>0.40</b> (0.20, 0.80)         | <b>0.009</b>   | 0.62 (0.24, 1.58)                | 0.32           |
| Intermediate vs. Low<br>recurrence score            | 0.82 (0.27, 2.46)                | 0.72           | 1.42 (0.27, 7.50)                | 0.68           |
| High vs. Low<br>recurrence score                    | <b>2.59</b> (1.44, 4.65)         | <b>0.001</b>   | <b>4.95</b> (1.82, 13.4)         | <b>0.002</b>   |

| Variable                                            | Relapse-Free survival    |                  | Overall survival         |              |
|-----------------------------------------------------|--------------------------|------------------|--------------------------|--------------|
|                                                     | Hazard Ratio<br>(95% CI) | p-value          | Hazard Ratio<br>(95% CI) | p-value      |
| Age, per decade                                     | <b>0.52</b> (0.33, 0.81) | <b>0.004</b>     | 0.57 (0.31, 1.04)        | 0.065        |
| Tumor grade 2 vs. 1                                 | 1.40 (0.72, 2.71)        | 0.32             | 2.48 (0.80, 7.70)        | 0.12         |
| Tumor grade 3 vs. 1                                 | 1.62 (0.82, 3.18)        | 0.16             | <b>4.92</b> (1.62, 14.9) | <b>0.005</b> |
| Size                                                | <b>1.66</b> (1.03, 2.65) | <b>0.036</b>     | 1.51 (0.80, 2.82)        | 0.20         |
| 1-3 vs. 0 positive nodes                            | 1.82 (0.92, 3.59)        | 0.085            | 1.89 (0.73, 4.89)        | 0.19         |
| >3 vs. 0 positive nodes                             | 2.34 (0.96, 5.68)        | 0.061            | 1.98 (0.60, 6.54)        | 0.26         |
| Hormonal or chemotherapy<br>vs. no adjuvant therapy | <b>0.34</b> (0.16, 0.68) | <b>0.003</b>     | 0.49 (0.18, 1.29)        | 0.15         |
| Luminal B                                           | <b>4.40</b> (2.47, 7.84) | <b>&lt;0.001</b> | <b>2.81</b> (1.33, 5.91) | <b>0.006</b> |
| Normal-like, HER2+/ER-,<br>or Basal-like            | <b>2.51</b> (1.38, 4.58) | <b>0.003</b>     | 1.92 (0.84, 4.37)        | 0.12         |

**Supplemental Table 5.** Two-way contingency table analysis measuring the association between the 70-gene, Wound-response, and Recurrence Score predictors in the ER+ 225-sample dataset.

**A.**

| Two-way contingency table                                | Wound-Response  |           |
|----------------------------------------------------------|-----------------|-----------|
|                                                          | Quiescent       | Activated |
| 70-gene predictor                                        | (# of patients) |           |
| Good                                                     | 47              | 66        |
| Poor                                                     | 13              | 99        |
| <b>Statistics for two-way contingency table analysis</b> |                 |           |
| p-value†                                                 | <0.001          |           |
| Cramer's V††                                             | 0.34            |           |

**B.**

| Two-way contingency table                                | Recurrence Score               |      |
|----------------------------------------------------------|--------------------------------|------|
|                                                          | Low or Int.<br>(# of patients) | High |
| <b>70-gene predictor</b>                                 |                                |      |
| Good                                                     | 83                             | 30   |
| Poor                                                     | 22                             | 90   |
| <b>Statistics for two-way contingency table analysis</b> |                                |      |
| p-value†                                                 | <0.001                         |      |
| Cramer's V††                                             | 0.54                           |      |

**C.**

| Two-way contingency table                                | Recurrence Score               |      |
|----------------------------------------------------------|--------------------------------|------|
|                                                          | Low or Int.<br>(# of patients) | High |
| <b>Wound Response</b>                                    |                                |      |
| Quiescent                                                | 47                             | 13   |
| Activated                                                | 58                             | 107  |
| <b>Statistics for two-way contingency table analysis</b> |                                |      |
| p-value†                                                 | <0.001                         |      |
| Cramer's V††                                             | 0.38                           |      |

† p-value calculated from Chi-square test on contingency table. †† Cramer's V statistic (value can range from 0 to 1) measures the strength of association between the two variables analyzed in the contingency table, with 1 indicating perfect association and 0 indicating no association.
